# Supplementary material
Source: publisher figshare collection journal article supplement (https://acs.figshare.com/ndownloader/files/20950533)
Supplement: Supplementary file 1 [file 20950533]

# ***In situ* functionalization of poly(hydroxyethyl methacrylate) cryogels with oligopeptides via $\beta$ -cyclodextrin-adamantane complexation for studying cell-instructive peptide environment**

**Thai Duong Luong<sup>a,±</sup>, Mohamed Zoughaib<sup>a,±</sup>, Ruslan Garifullin<sup>a,b,\*</sup>, Svetlana Kuznetsova<sup>a</sup>, Mustafa O. Guler<sup>c</sup>, Timur I. Abdullin<sup>a,\*</sup>**

<sup>a</sup>Institute of Fundamental Medicine and Biology, Kazan Federal University, Kazan, Russia

<sup>b</sup>Institute of Materials Science and Nanotechnology, Bilkent University, Ankara, Turkey

<sup>c</sup>Pritzker School of Molecular Engineering, University of Chicago, Chicago, IL, USA

**<sup>±</sup> These authors have equal contribution to this article.**

**\*Corresponding authors:**

T.Abdullin (tabdulli@gmail.com, timur.abdullin@kpfu.ru), R.Garifullin (rigarifullin@kpfu.ru)

**A**

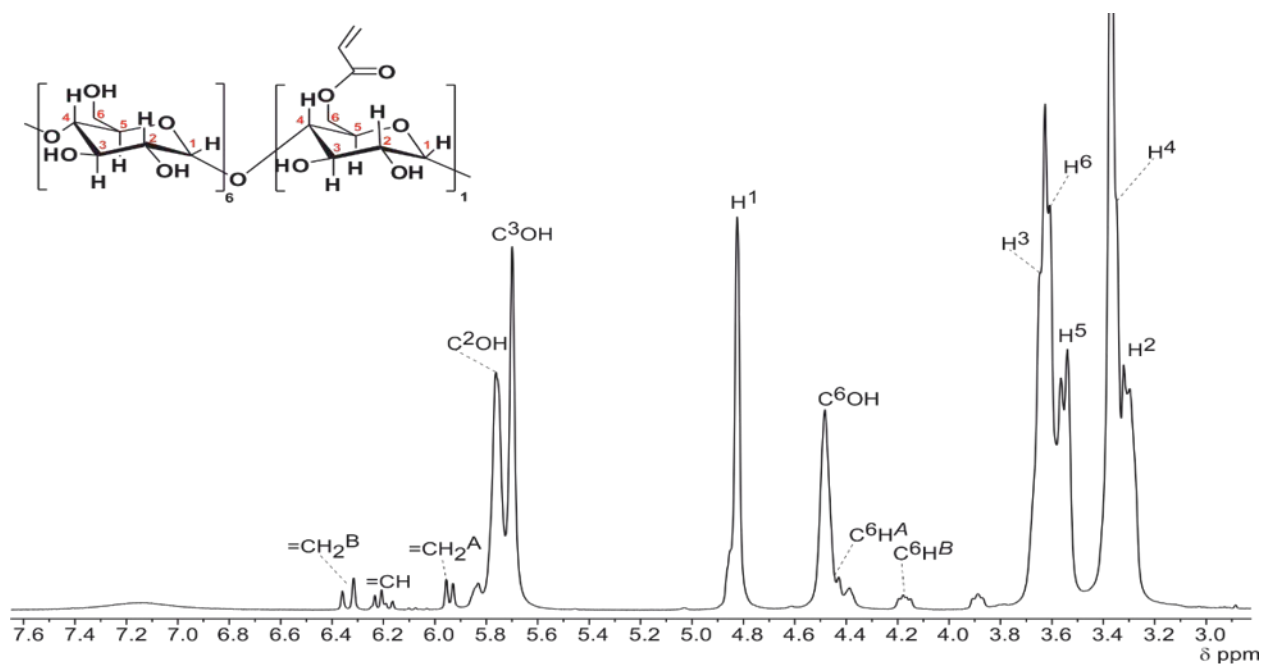

**B**

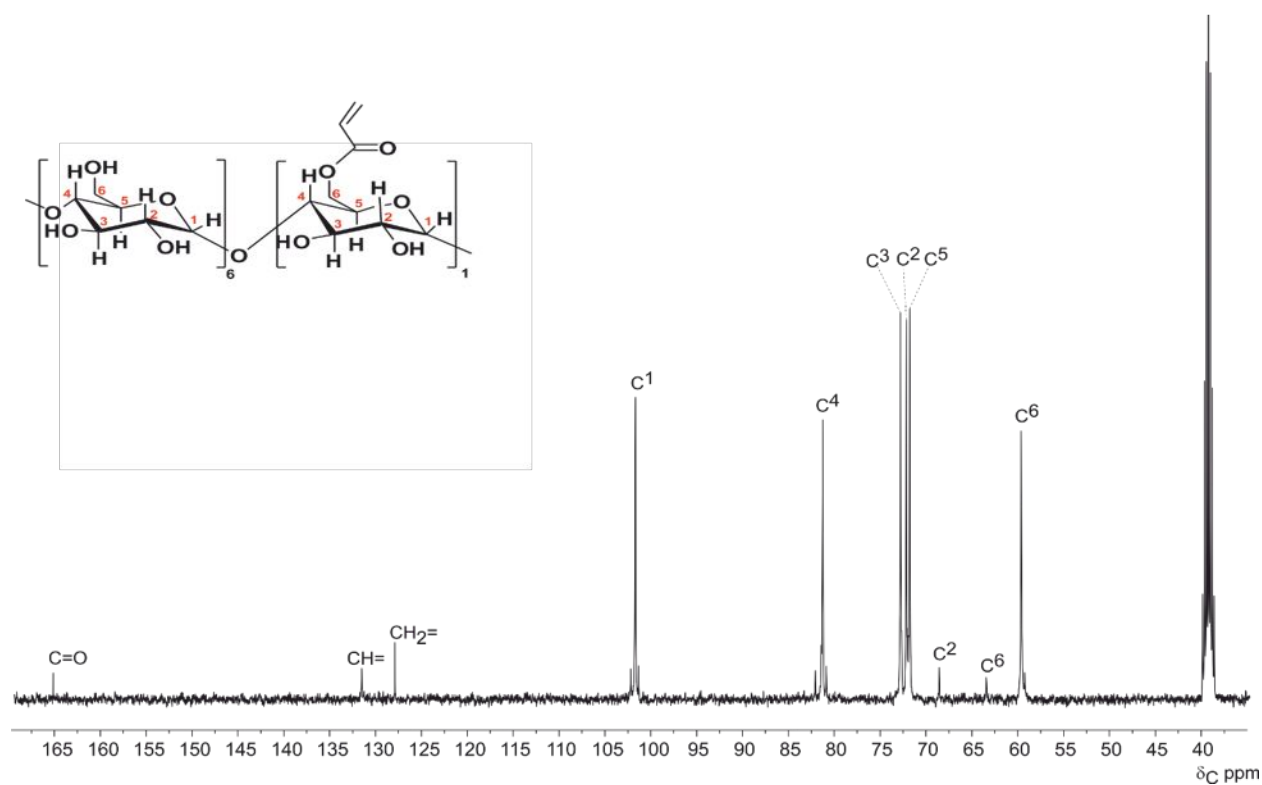

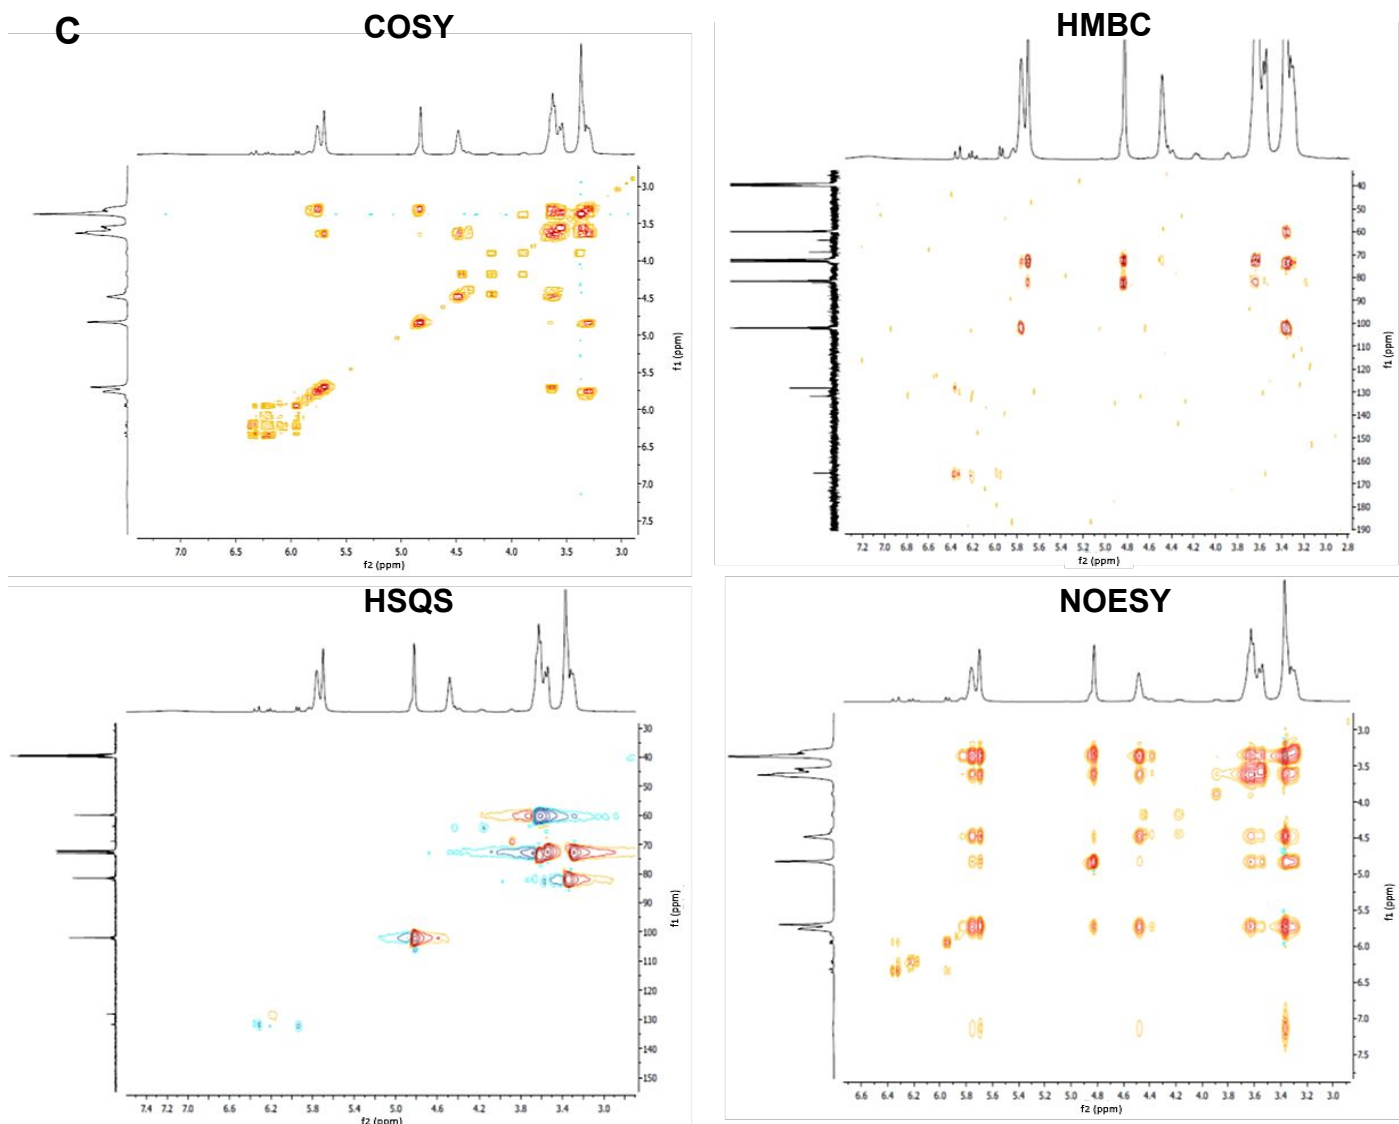

**D**

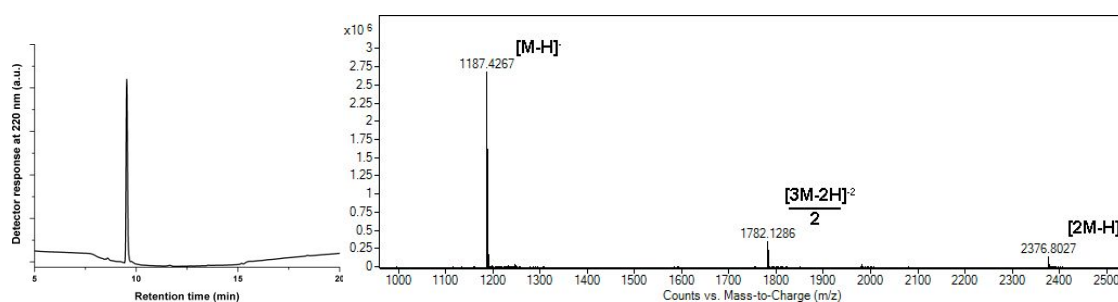

**Figure S1.** NMR and LC-MS spectra of acryloyl-CD. A.  $^1\text{H}$  NMR spectrum (400 MHz,  $\text{DMSO-d}_6$ ). The peaks characteristic of the acrylate moiety appeared at chemical shifts range  $\delta$ : 5.9–6.4 ppm, attributed to  $\text{CH}_2=\text{CH}$  of the methine and methylene protons in the vinyl group. B.  $^{13}\text{C}$  NMR spectrum (100.6 MHz,  $\text{DMSO-d}_6$ ). The peaks at 128, 133 and 165 ppm are associated, respectively, with  $\text{CH}_2=$ ,  $\text{CH=}$  and  $\text{C=O}$  of the acrylate moiety. C. 2D (COSY, HMBC, HSQS, NOESY) NMR spectra. D. LC-MS spectra of acryloyl-CD.

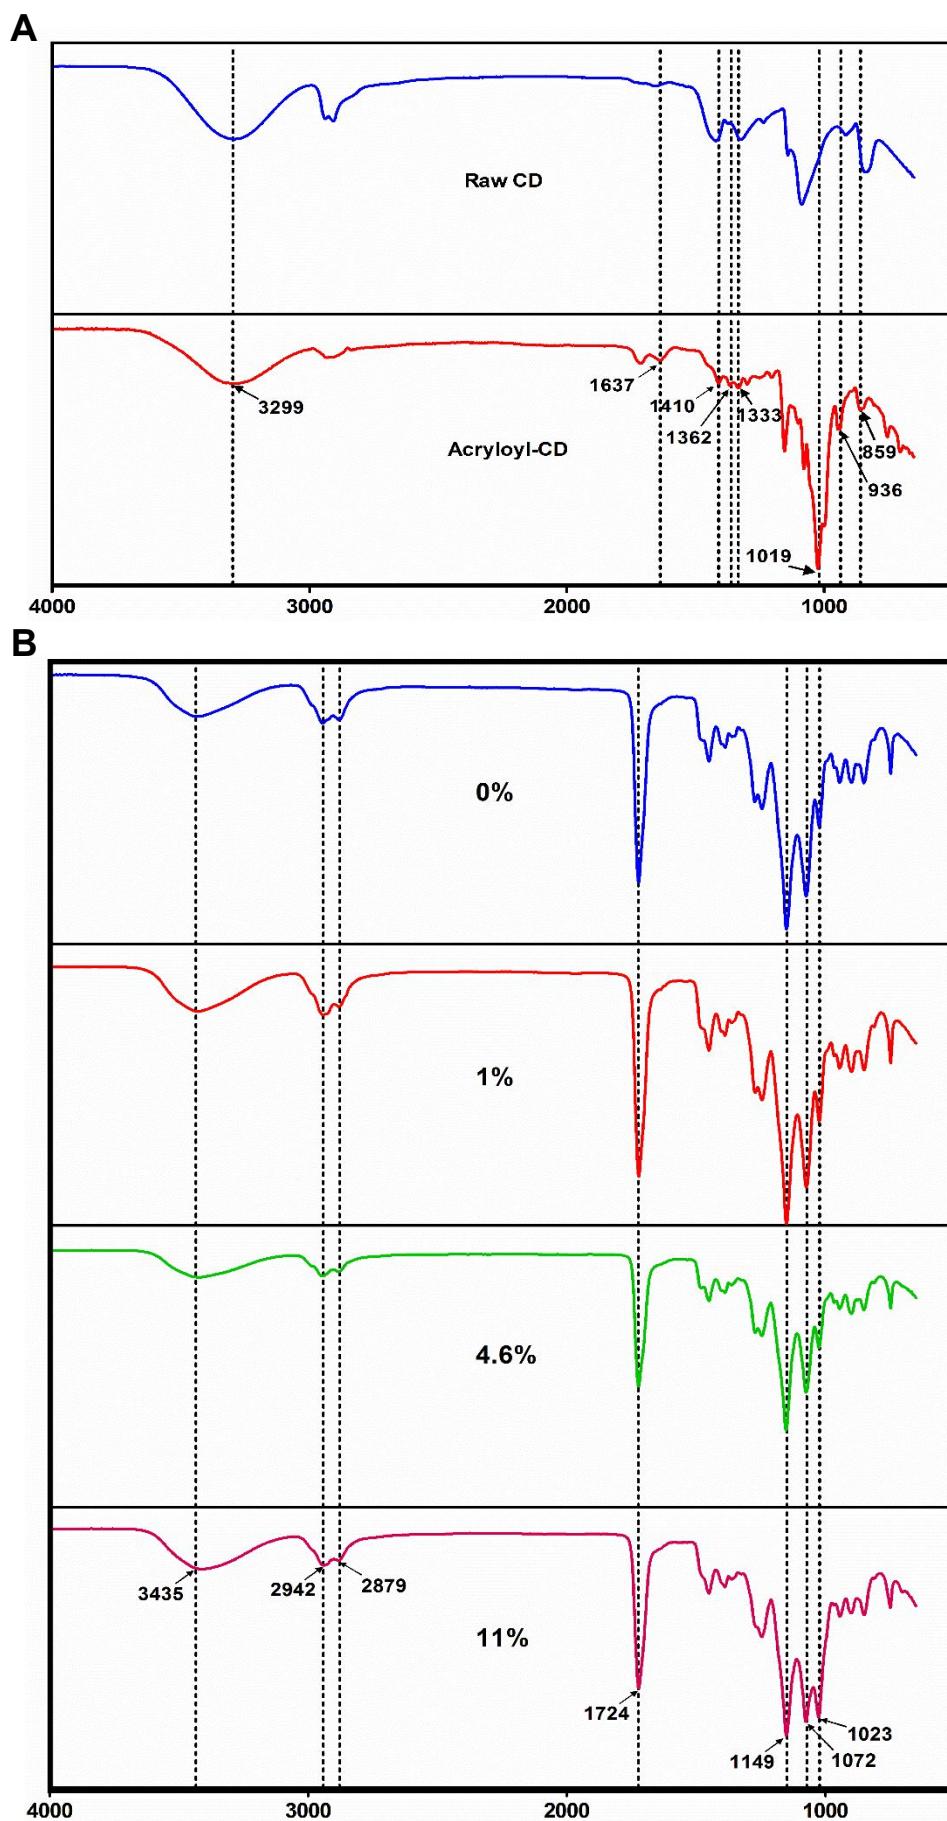

**Figure S2.** FTIR spectra of (A)  $\beta$ -cyclodextrin (CD)/acryloyl-CD, (B) pHEMA and CD-modified (pHEMA/CD) cryogels prepared with different CD concentrations (0–11%).

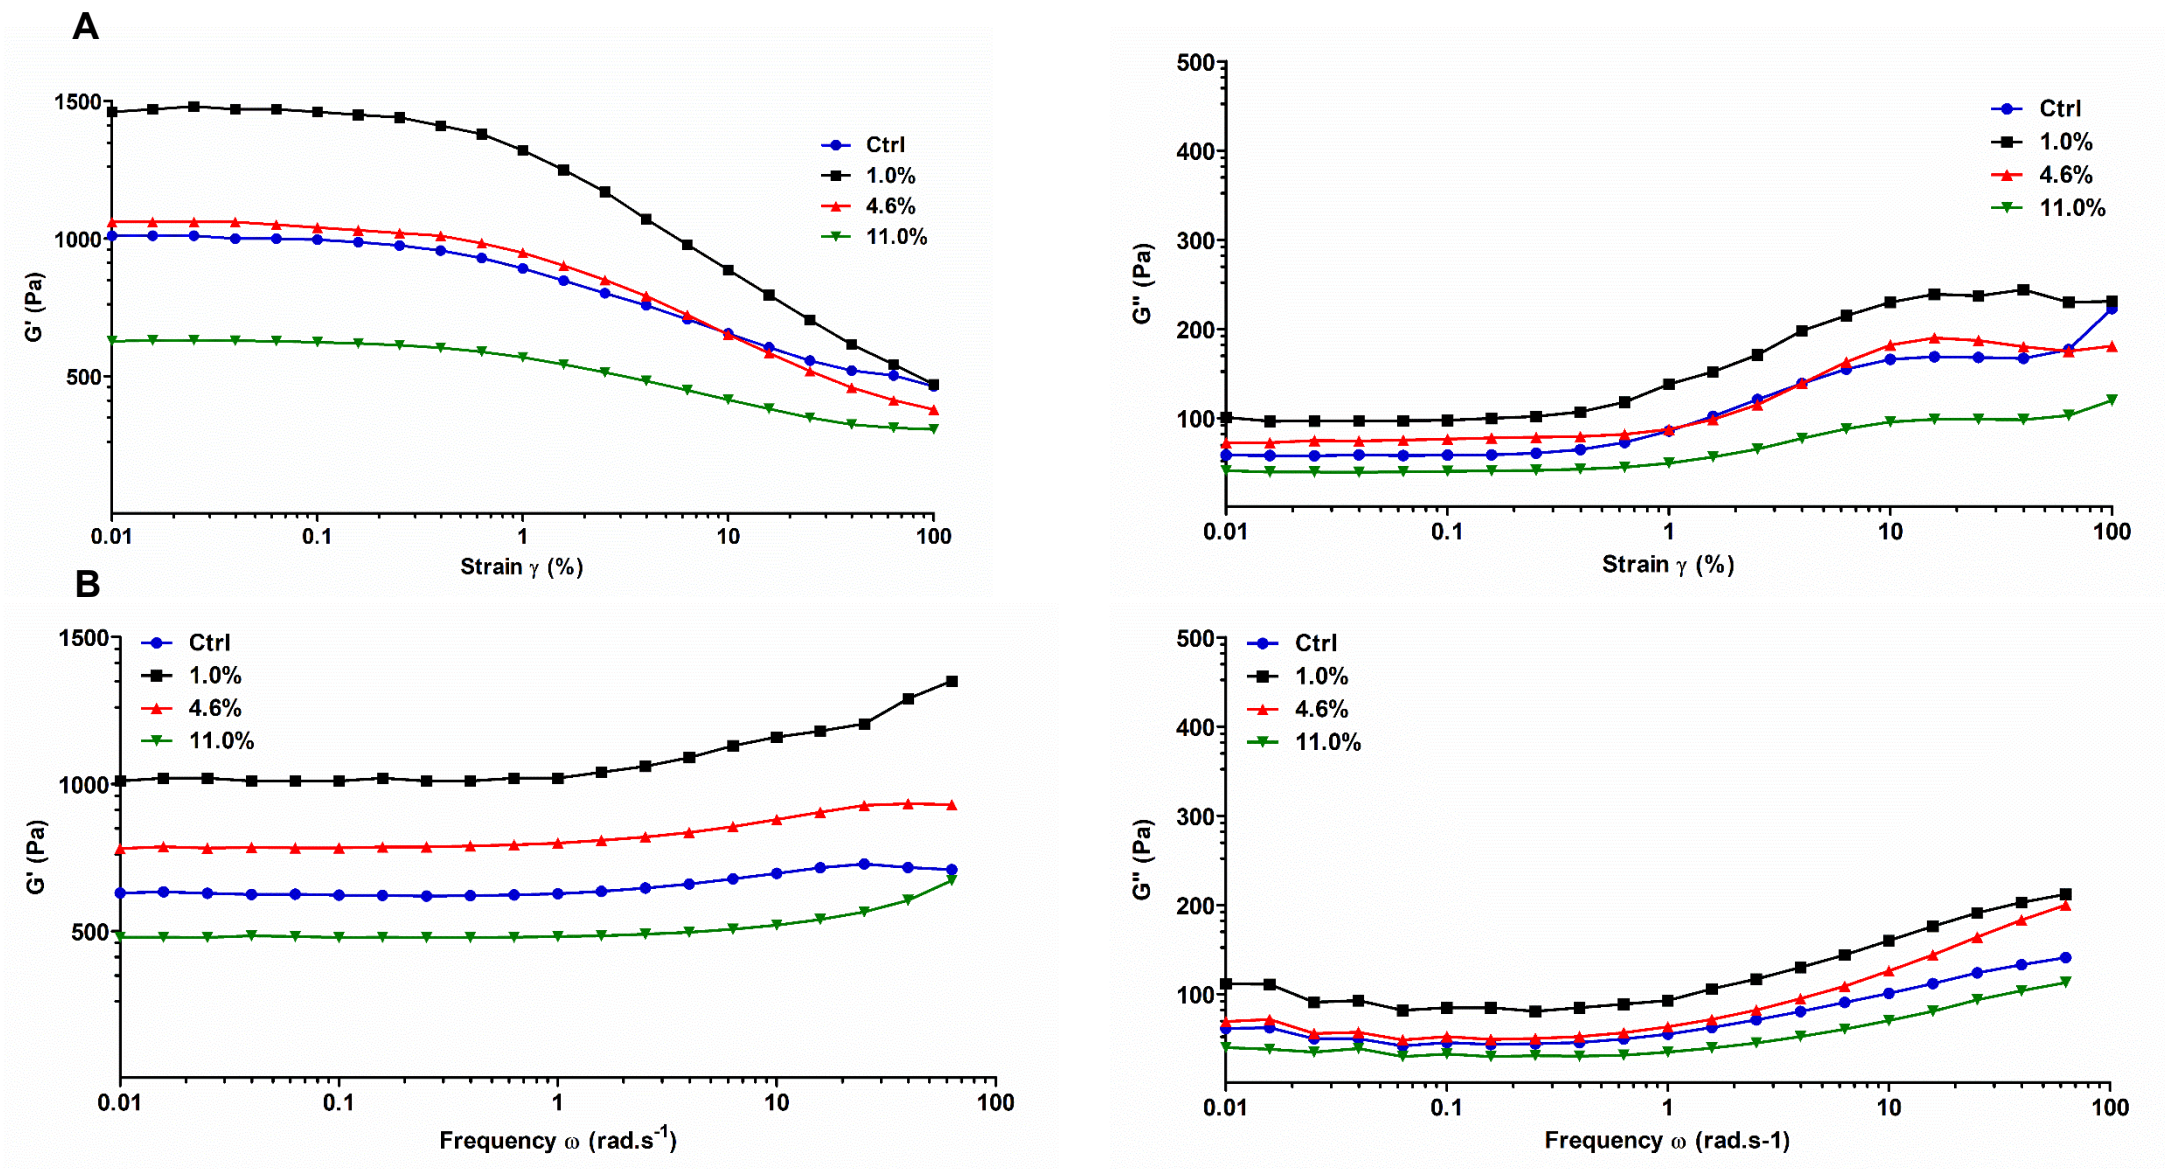

**Figure S3.** A. Strain amplitude sweep test of the CD-modified pHEMA cryogels. The storage  $G'$  and loss  $G''$  moduli are shown as function of strain at angular frequency  $\omega = 10 \text{ rad.s}^{-1}$ . B. Frequency sweep test for the same samples. The measurement of frequency dependence of  $G'$  and  $G''$  was performed within LVR at  $\delta=1\%$  strain deformation.

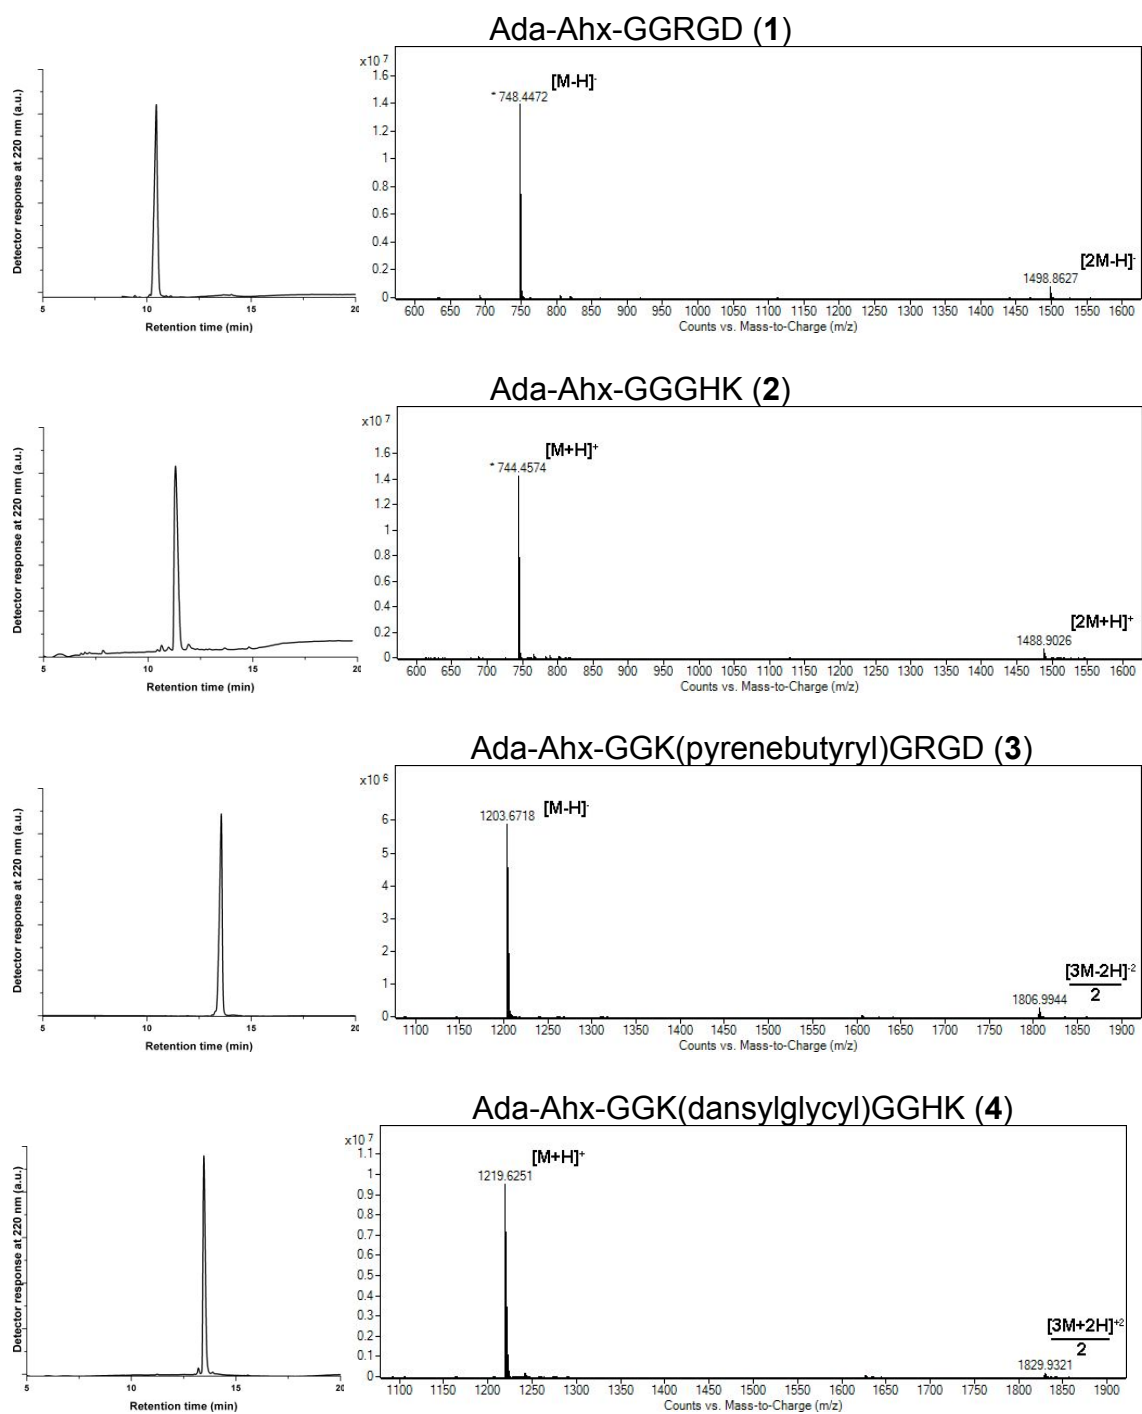

**Figure S4.** LC-MS spectra of Ada-Ahx-GGRGD (1), Ada-Ahx-GGGHK (2), Ada-Ahx-GGK(pyrenebutyryl)GRGD (3) and Ada-Ahx-GGK(dansylglycyl)GGHK (4) peptides.

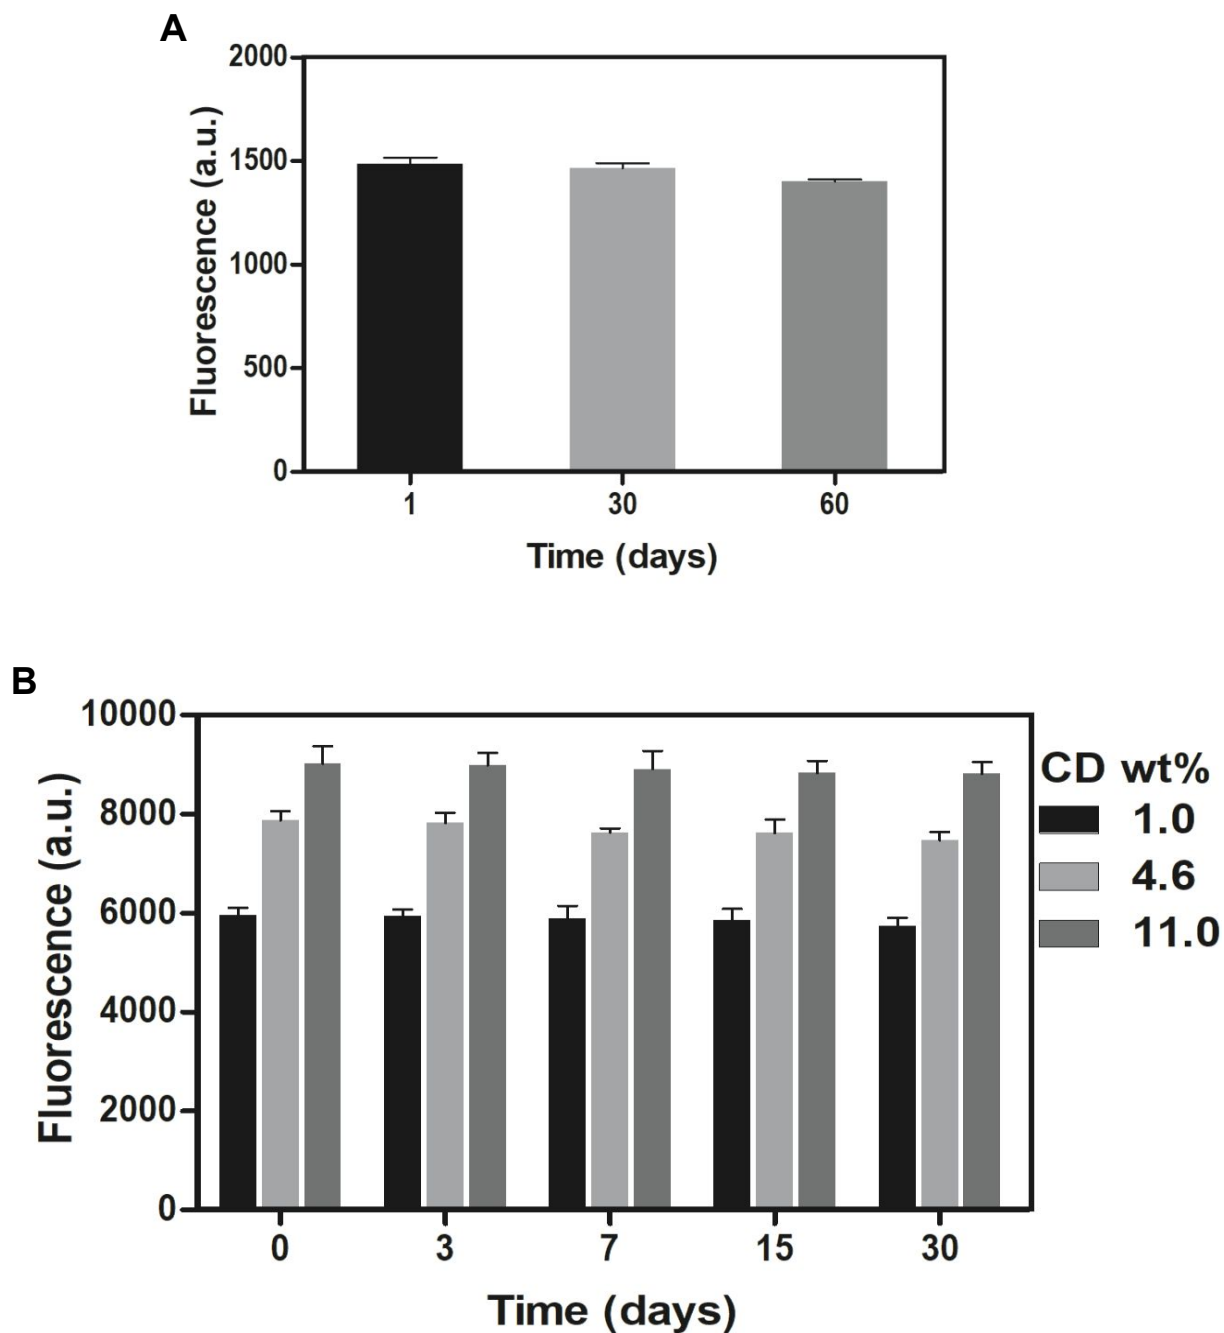

**Figure S5.** A. Mean fluorescence intensity of modified pHEMA cryogel (4.6% CD) with affinity bound TBO; the material was stored during 60 days followed by staining with TBO. B. Mean fluorescence intensity of CD-modified pHEMA cryogels with affinity bound Ada-Ahx-GGK(pyrenebutyryl)GRGD peptide; the materials functionalization with the peptide was followed by storage during 30 days.
